# Supplementary material for: Saponin-Based Nanoemulsification Improves the Antioxidant Properties of Vitamin A and E in AML-12 Cells
Source: MDPI journal article supplement (doi:10.3390/ijms17091406), 2016-08-26
Supplement: s1 [file s1]

# Supplementary Materials: Saponin-Based Nanoemulsification Improves the Antioxidant Properties of Vitamin A and E in AML-12 Cells

Qaisra Naheed Choudhry, Mi Jeong Kim, Tae Gyun Kim, Jeong Hoon Pan, Jun Ho Kim, Sung Jin Park, Jin Hyup Lee and Young Jun Kim

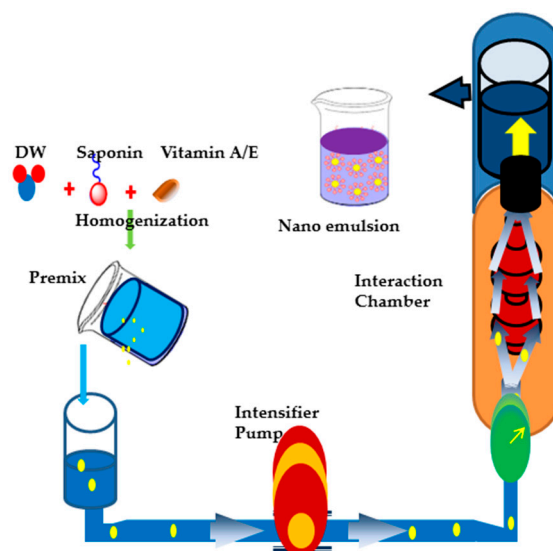

**Figure S1.** Schematic flow diagram representing the preparation method of o/w nanoemulsions of vitamin A and E using saponin as surfactant. 10% (*w/w*) of fat-soluble vitamins (VA or VE) and 1% (*w/w*) of natural surfactants (saponin) were blended in deionized water using a high-speed blender. Subsequently, the pre-emulsion mixture was passed through a high-pressure homogenizer (MN400BF, Micronox, Seongnam, Korea) at a pressure of 25 kpsi for seven cycles to produce nanoemulsions.

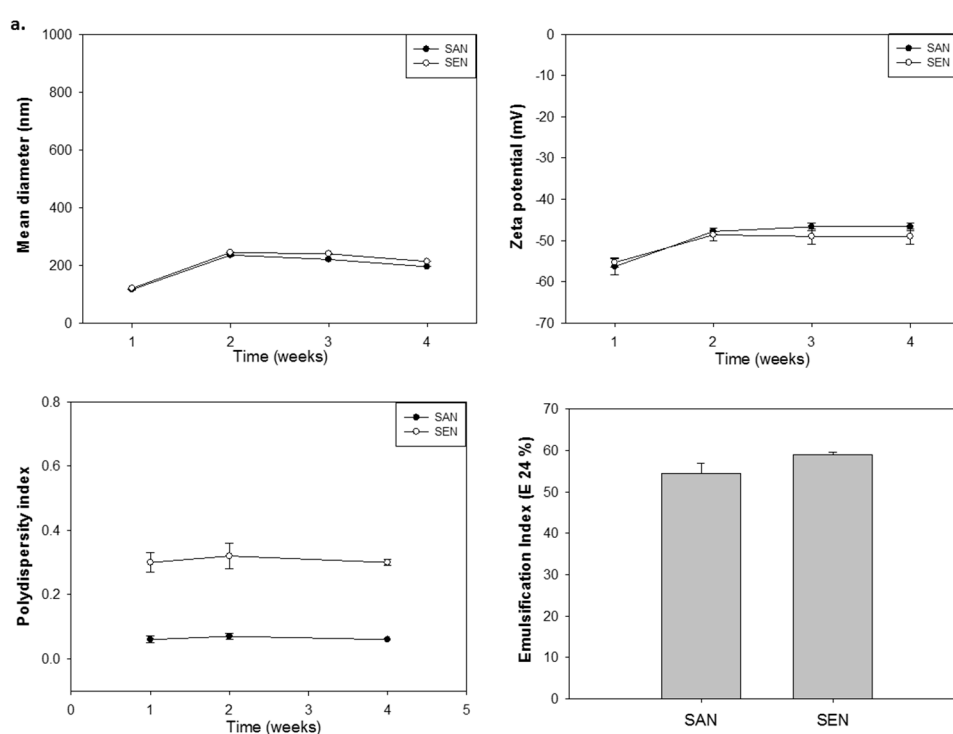

**Figure S2.** Cont.

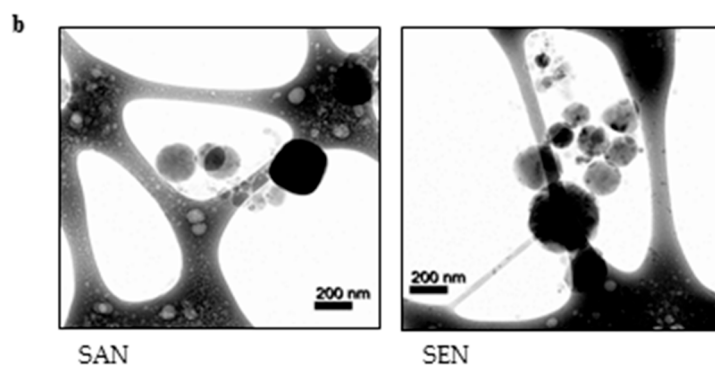

**Figure S2.** Nanoemulsion characterization. (a) Physiochemical properties of SAN and SEN; (b) Cryo-TEM images of SAN and SEN. SAN, saponin nanoemulsion of vitamin A; SEN, saponin nanoemulsion of vitamin E.

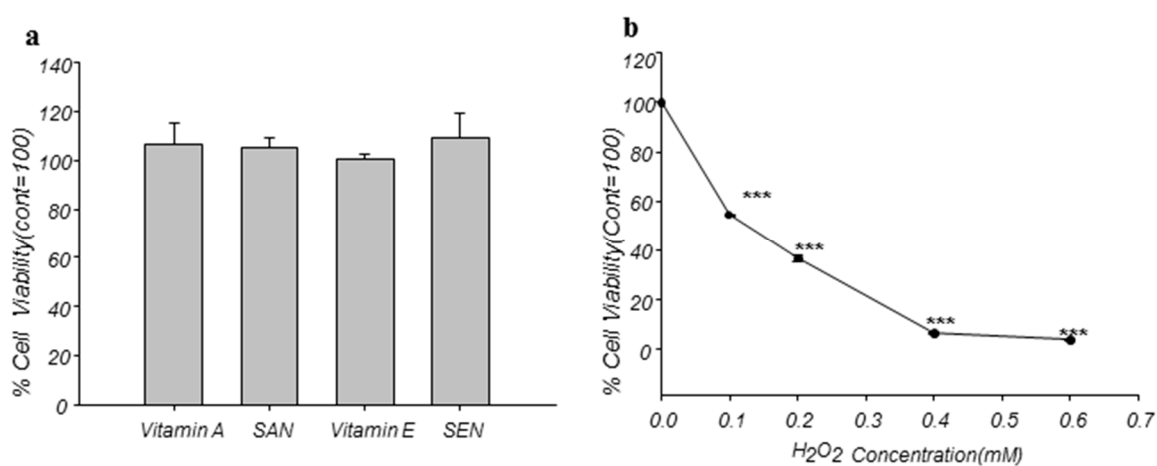

**Figure S3.** Cytotoxicity. (a) Cells were exposed to 200  $\mu$ g/mL of Vitamin A, SAN, vitamin E, and SEN for 16 h. Cell viability was determined by MTT assay; (b) AML-12 cells were exposed to exogenous H<sub>2</sub>O<sub>2</sub> at the indicated concentrations for 16 h. Cell viability was determined by MTT assay. SAN, saponin nanoemulsion of vitamin A; SEN, saponin nanoemulsion of vitamin E. \*\*\*  $p < 0.001$ .
